# Supplementary material
Source: publisher site journal article supplement (https://www.kjim.org/upload/media/kjim-2020-386-suppl2.pdf)
Supplement: Supplementary file 1 [file kjim-2020-386-suppl2.pdf]

**Supplementary Table 2. Clinical factors associated with seronegativity among patients who did not undergo immunosuppressive therapy**

| Viruses               | Clinical factors                          | aOR (95% CI)     | p value |
|-----------------------|-------------------------------------------|------------------|---------|
| Measles               | Age at serological test, /yr              | 0.91 (0.87–0.96) | < 0.001 |
| Mumps                 | None was selected                         |                  |         |
| Rubella               | None was selected                         |                  |         |
| VZV                   | Age at serological test, /yr              | 0.82 (0.71–0.95) | 0.006   |
|                       | Disease duration at serological test, /mo | 1.02 (1.00–1.03) | 0.072   |
|                       | Crohn's disease                           | 0.32 (0.08–1.25) | 0.099   |
| HAV                   | Age at serological test, /yr              | 0.93 (0.91–0.95) | < 0.001 |
| EBV                   | None was selected                         |                  |         |
| UC patients (n = 107) |                                           |                  |         |
| Measles               | Age at serological test, /yr              | 0.94 (0.89–0.99) | 0.015   |
| Mumps                 | None was selected                         |                  |         |
| Rubella               | None was selected                         |                  |         |
| VZV                   | Age at serological test, /yr              | 0.86 (0.75–0.99) | 0.035   |
| HAV                   | Age at serological test, /yr              | 0.93 (0.90–0.96) | < 0.001 |
| EBV                   | None was selected                         |                  |         |
| CD patients (n = 75)  |                                           |                  |         |
| Measles               | Age at serological test, /yr              | 0.84 (0.74–0.95) | 0.006   |
| Mumps                 | None was selected                         |                  |         |
| Rubella               | None was selected                         |                  |         |
| VZV                   | None was selected                         |                  |         |
| HAV                   | Age at serological test, /yr              | 0.96 (0.91–1.00) | 0.048   |
| EBV                   | None was selected                         |                  |         |

aOR, adjusted odds ratio; CI, confidence interval; VZV, varicella zoster virus; HAV, hepatitis A virus; EBV, Epstein-Barr virus; UC, ulcerative colitis; CD, Crohn's disease.
